# Supplementary material
Source: publisher site journal article supplement (https://www.dovepress.com/article/274394)
Supplement: Supplementary file 1 [file get_supplementary_file.php]

**Table S1** Primer sequences used in quantitative PCR

| Components | Position | Sequence |
| --- | --- | --- |
| TZAP | Forward | AAG GCC CTT AGA GGC TGA AG |
|  | Reverse | GAC TCC CTC CTG GTC AGC AC |
| TERT | Forward | TGA CAC CTC ACC TCA CCC AC |
|  | Reverse | CAC TGT CTT CCG CAA GTT CAC |
| Telomere | Forward | CGG TTT GTT TGG GTT TGG GTT TGG GTT TGG GTT TGG GTT |
|  | Reverse | GGC TTG CCT TAC CCT TAC CCT TAC CCT TAC CCT TAC CCT |
| β-Actin | Forward | ACC CAC ACT GTG CCC ATC TAC |
|  | Reverse | TCG GEG AGG ATC TTC ATG AGG |
